# Supplementary material for: Anthocyanins from the fruits ofLycium ruthenicumMurray improve high-fat diet-induced insulin resistance by ameliorating inflammation and oxidative stress in mice
Source: Royal Society of Chemistry journal article supplement (doi:10.1039/d0fo02936j), 2021-01-01

**28th June 2021**

Note added after first publication: This Supplementary Information file replaces that originally published on 1st March 2021

## Supporting Information

Table S1. Primer sequences used for real-time quantitative PCR.  
Reproduced with permission from ref. 1. Copyright 2021 John Wiley and Sons.

| Gene           | Forward Primer (5'-3')    | Reverse Primer (5'-3')    | Amplicon Size | Accession number |
|----------------|---------------------------|---------------------------|---------------|------------------|
| IL-6           | CTGCAAGAGACTTCCATCCAGTT   | GAAGTAGGGAAGGCCGTGG       | 70            | NM_001314054.1   |
| IL-1 $\beta$   | TCGCTCAGGGTCACAAGAAA      | CATCAGAGGCAAGGAGGAAAAC    | 73            | NM_008361.4      |
| TNF- $\alpha$  | CCACCACGCTCTTCTGTCTAC     | TGGGCTACAGGCTTGTCACT      | 151           | NM_013693.3      |
| IL-10          | GCTCTTACTGACTGGCATGAG     | CGCAGCTCTAGGAGCATGTG      | 105           | NM_010548.2      |
| TLR4           | GTTGCAGAAAATGCCAGGATG     | CAGGGATTCAAGCTTCCTGGT     | 101           | NM_021297.3      |
| NF- $\kappa$ B | CCCTACGGAACTGGGCAAAT      | GCGGAATCGAAATCCCCTCT      | 153           | NM_008689.2      |
| TGF- $\beta$ 1 | CTCCCGTGGCTTCTAGTGC       | GCCTTAGTTTGGACAGGATCTG    | 133           | NM_011577.2      |
| GPR5           | CCTCATGCACCACATTCCT       | AAATCTCAGGCAGGCAGCTT      | 190           | NM_011798.4      |
| MCP-1          | GCTCAGCCAGATGCAGTTAA      | TCTTGAGCTTGGTGACAAAAC     | 148           | NM_011333.3      |
| Nrf2           | AGCCAGCTGACCTCCTTAGA      | AGTGACTGACTGATGGCAGC      | 131           | NM_010902.4      |
| COX-2          | AGCCCATTGAACCTGGACTG      | ACCCAATCAGCGTTTCTCGT      | 125           | NM_011198.4      |
| NOS2           | GGCAGCCTGTGAGACCTTTG      | GCATTGGAAGTGAAGCGTTTC     | 72            | NM_001313922.1   |
| NQO-1          | GGTATTACGATCCTCCCTCAACATC | GAGTACCTCCCATCCTCTCTTCTTC | 146           | NM_008706.5      |
| HO-1           | CCACCAAGTTCAAACAGCTCTAT   | CTGACGAAGTGACGCCATCT      | 191           | NM_010442.2      |
| G-6-Pase       | TCCTCCTCAGCCTATGTCTGCATTC | GAGAGAAGAATCCTGGGTCTCCTTG | 168           | NM_008061.4      |
| PEPCK          | TCTTTGGTGGCCGTAGACCTG     | GCCAGGTATTTGCCGAAGTTGTAG  | 190           | NM_011044.3      |
| PYY            | CTTCACAGACGACAGCGACA      | GGGAAATGAACACACACAGCC     | 197           | NM_001346771.1   |
| GLP-1          | AGGGACCTTACCAGTGATGT      | AATGGCGACTTCTTCTGGGAA     | 115           | NM_008100.4      |
| GAPDH          | GGTTGTCTCCTGCGACTTCA      | TGGTCCAGGGTTTCTTACTCC     | 183           | NM_001289726.1   |

**Fig. S1** High-performance liquid chromatograms of the extract of anthocyanins (A), total ion chromatogram (B), and mass spectra of 12 anthocyanins (C). Reproduced with permission from ref. 1. Copyright 2021 John Wiley and Sons.

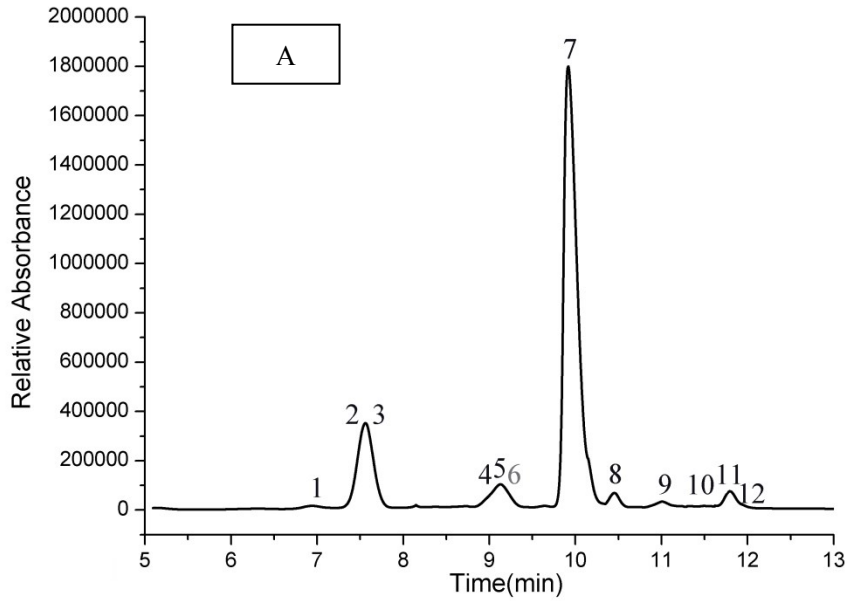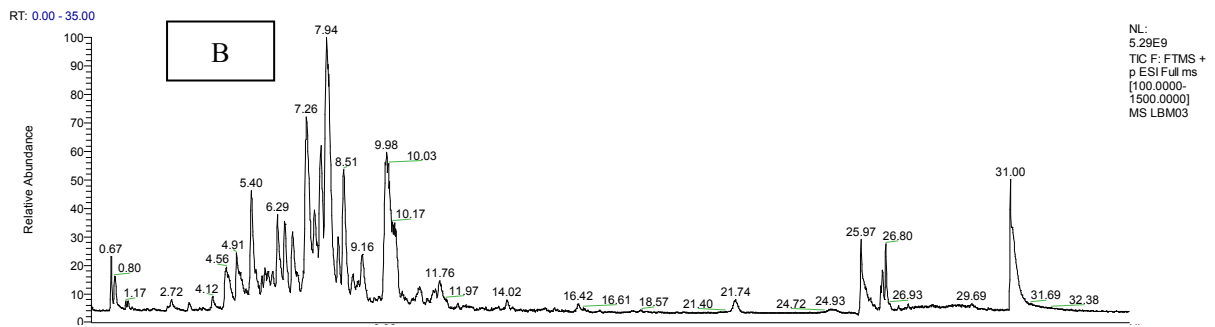

C

### 1. Delphinidin-3-O-[6''-O-(rhamnosyl) glucoside]-5-O-glucoside

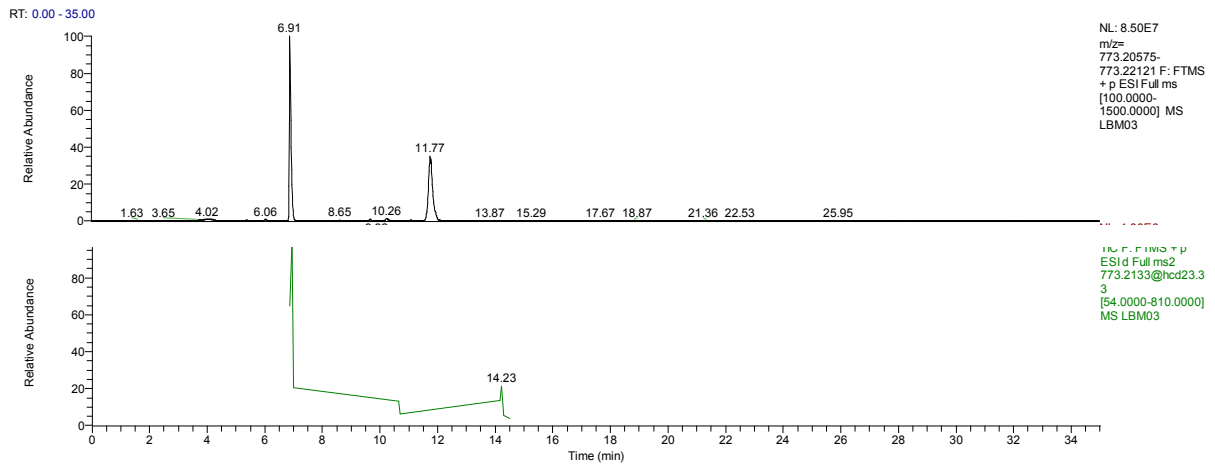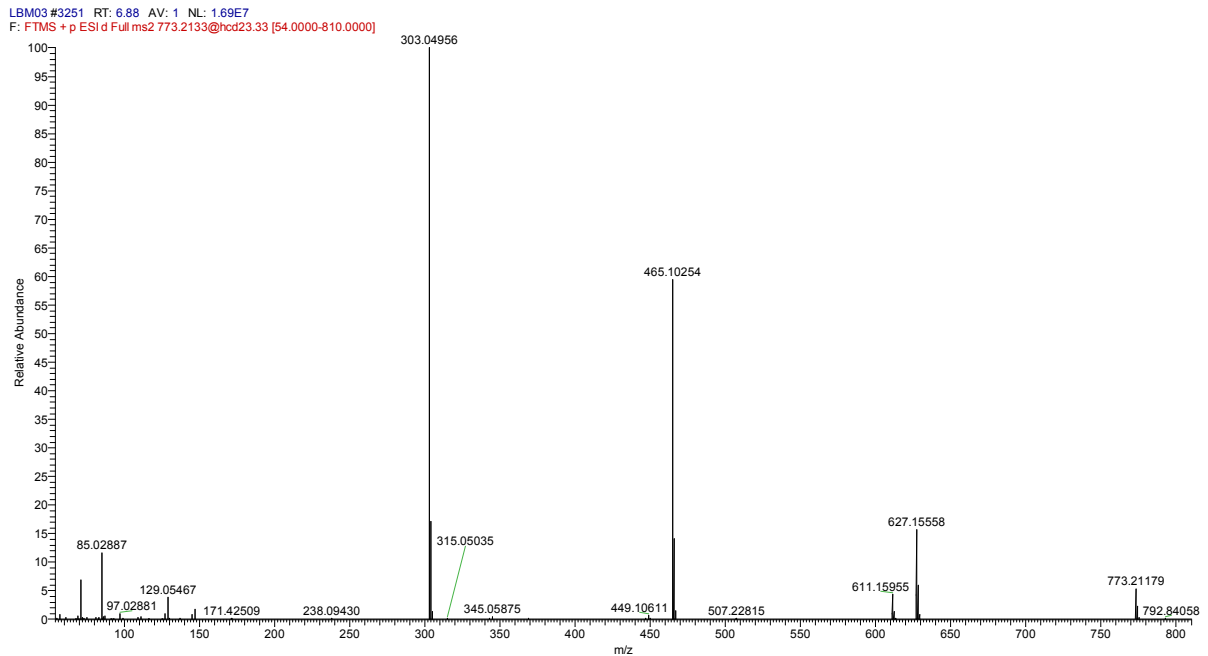

### 2. Petunidin-3-O-rutinoside(glucosyl-p-coumaroyl)-5-O-glucoside

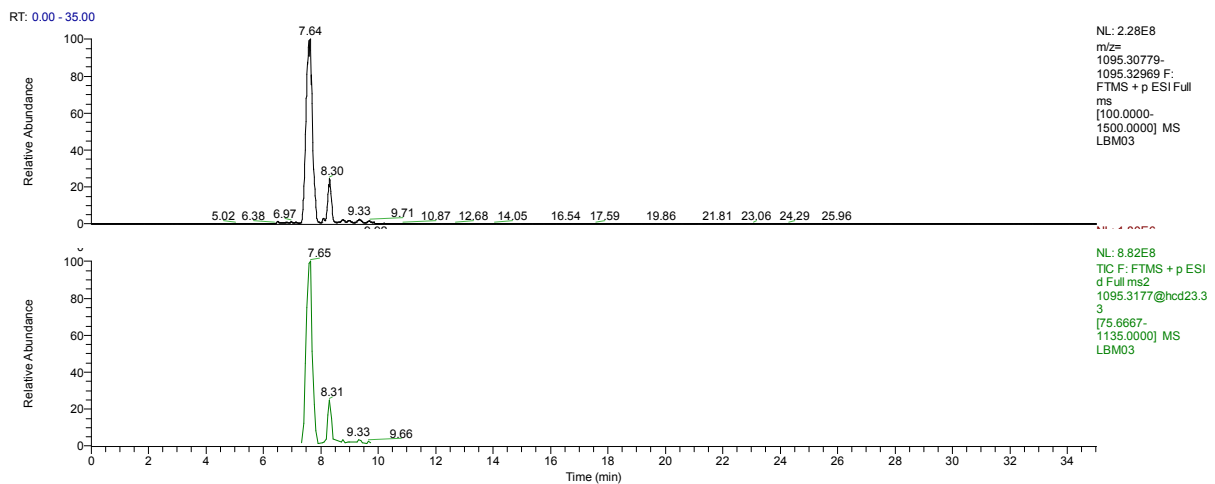

LBM03 #3596 RT: 7.59 AV: 1 NL: 3.58E8  
F: FTMS + p ESI d Full ms2 1095.3177@hcd23.33 [75.6667-1135.0000]

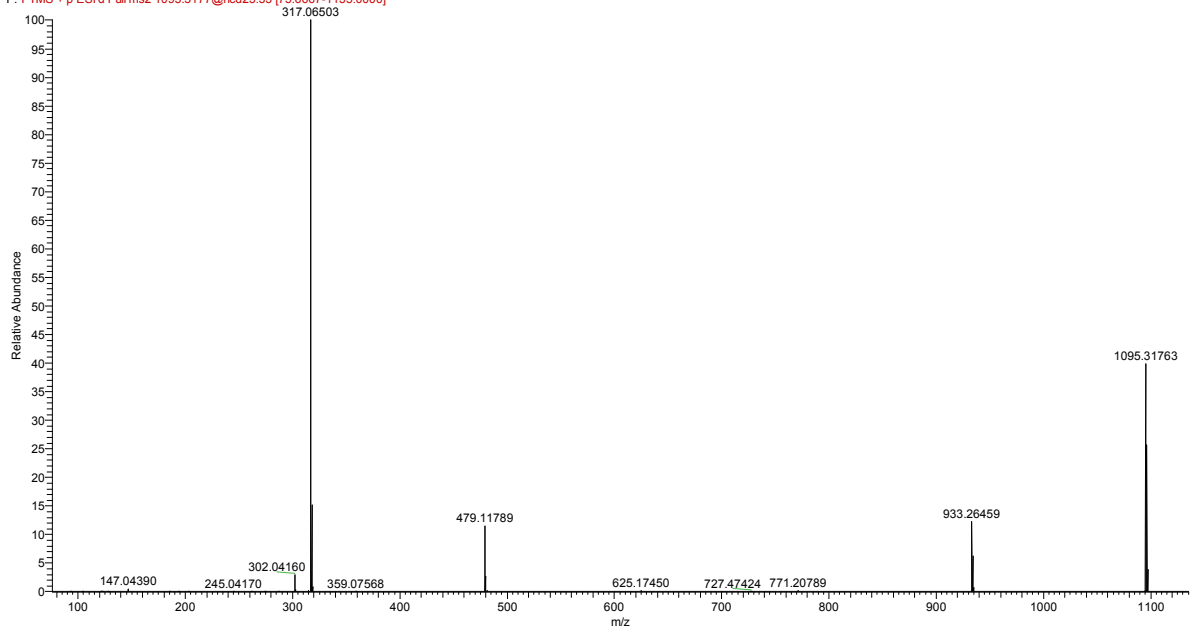

### 3. Petunidin-3-O-glucoside

RT: 0.00 - 35.00

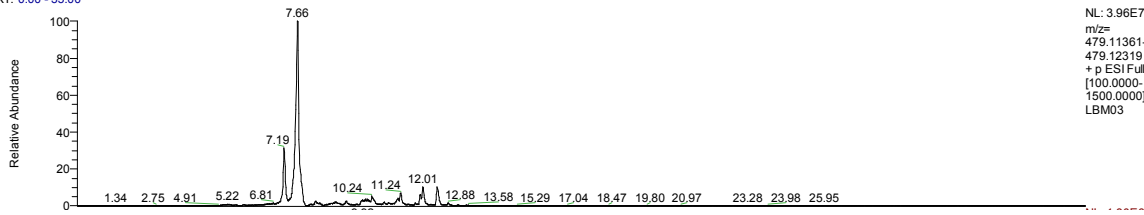

NL: 3.96E7  
m/z=  
479.11361-  
479.12319 F: FTMS  
+ p ESI Full ms  
[100.0000-  
1500.0000] MS  
LBM03

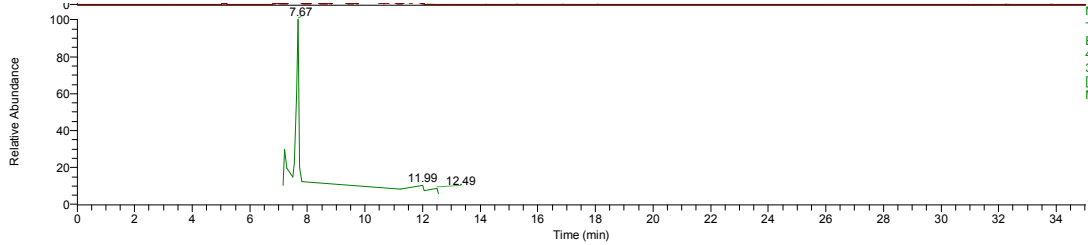

NL: 3.24E7  
TIC F: FTMS + p  
ESI d Full ms2  
479.1169@hcd23.3  
3  
[50.0000-510.0000]  
MS LBM03

LBM03 #3639 RT: 7.67 AV: 1 NL: 1.73E7  
F: FTMS + p ESI d Full ms2 479.1169@hcd23.33 [50.0000-510.0000]

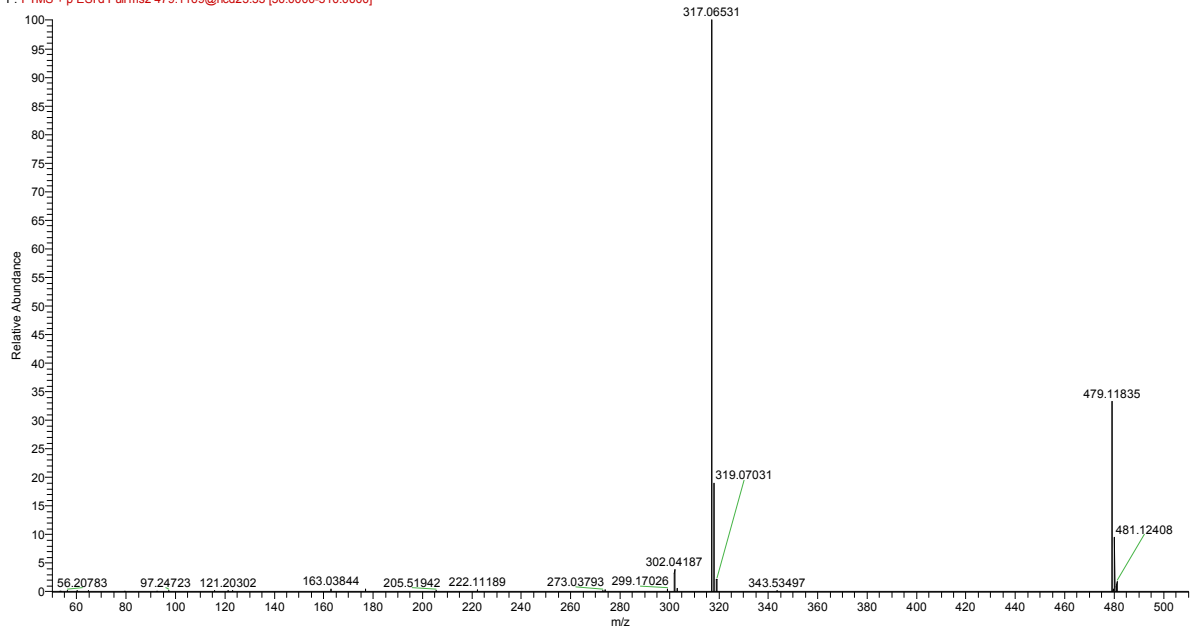

#### 4. Delphinidin3-O-[6''-O-(rhamnosyl)glucoside]-7-O-rhamnoside

RT: 0.00 - 35.00

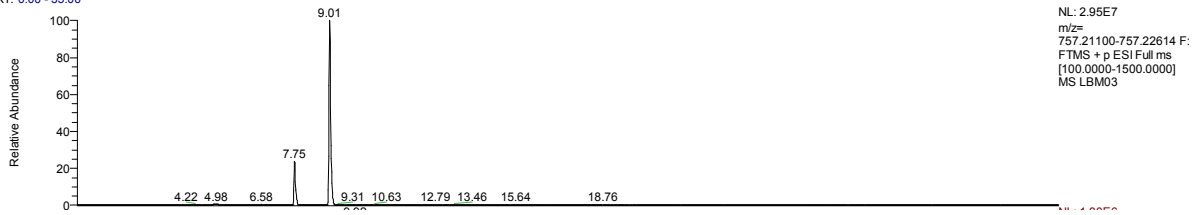

NL: 2.95E7  
m/z=  
757.21100-757.22614 F:  
FTMS + p ESI d Full ms  
[100.0000-1500.0000]  
MS LBM03

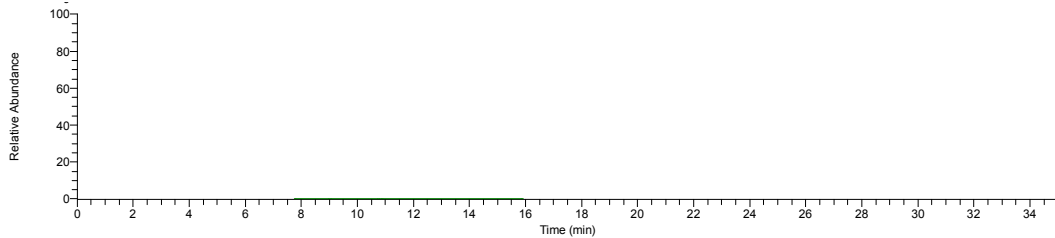

NL: 0  
m/z=  
328.73809-328.74466 F:  
FTMS + p ESI d Full ms2  
757.2178@hcd23.33  
[52.6667-790.0000] MS  
LBM03

LBM03 #4272 RT: 8.99 AV: 1 NL: 9.83E6  
F: FTMS + p ESI d Full ms2 757.2178@hcd23.33 [52.6667-790.0000]

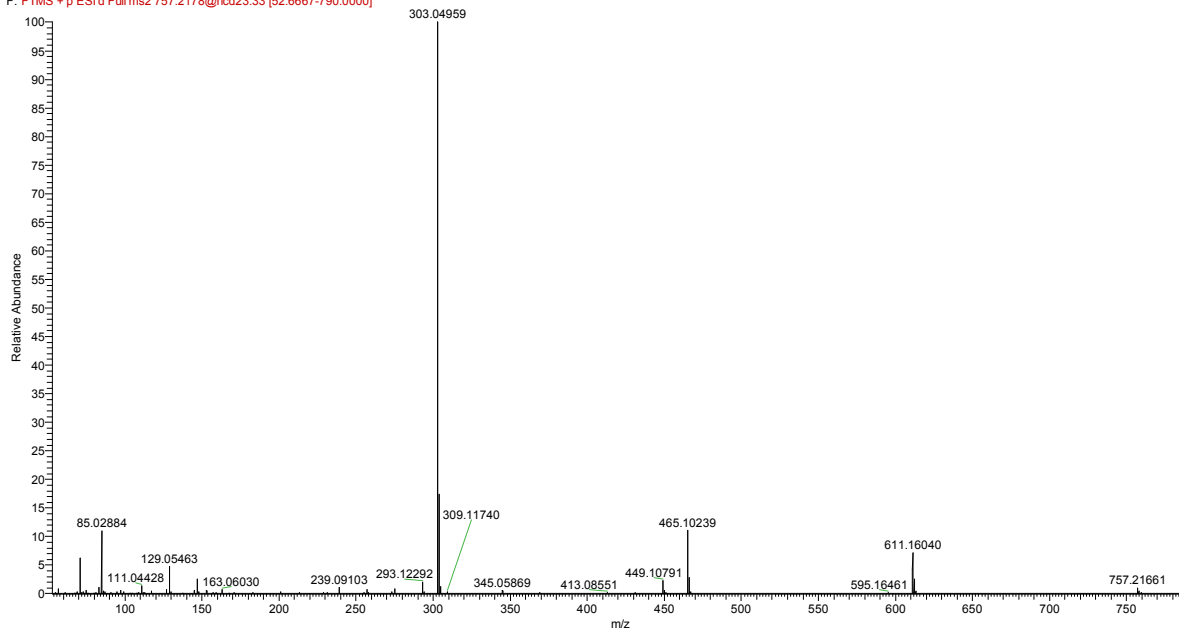

## 5. Petunidin-3-O-rutinoside(caffeoyl)-5-O-glucoside

RT: 0.00 - 35.00

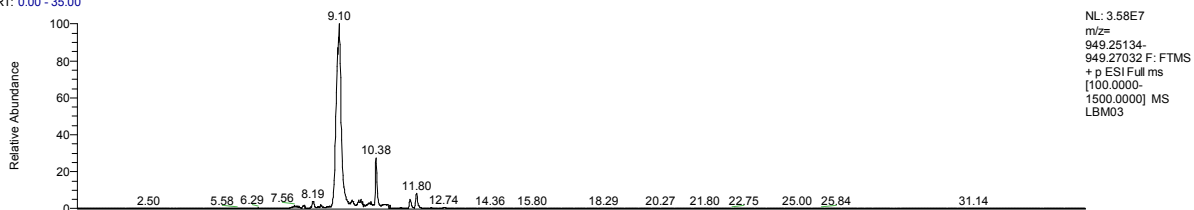

NL: 3.58E7  
m/z=  
949.25134-  
949.27032 F: FTMS  
+ p ESI Full ms  
[100.0000-  
1500.0000] MS  
LBM03

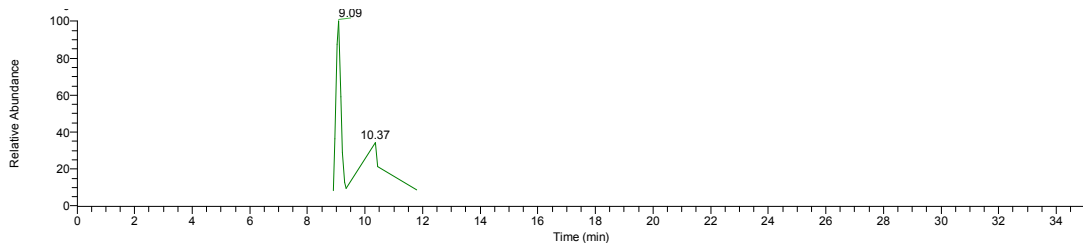

NL: 9.11E7  
TIC F: FTMS + p  
ESI d Full ms2  
949.2605@hcd23.3  
3  
[66.0000-990.0000]  
MS LBM03

LBM03 #4292 RT: 9.03 AV: 1 NL: 3.39E7

F: FTMS + p ESI d Full ms2 949.2605@hcd23.33 [66.0000-990.0000]

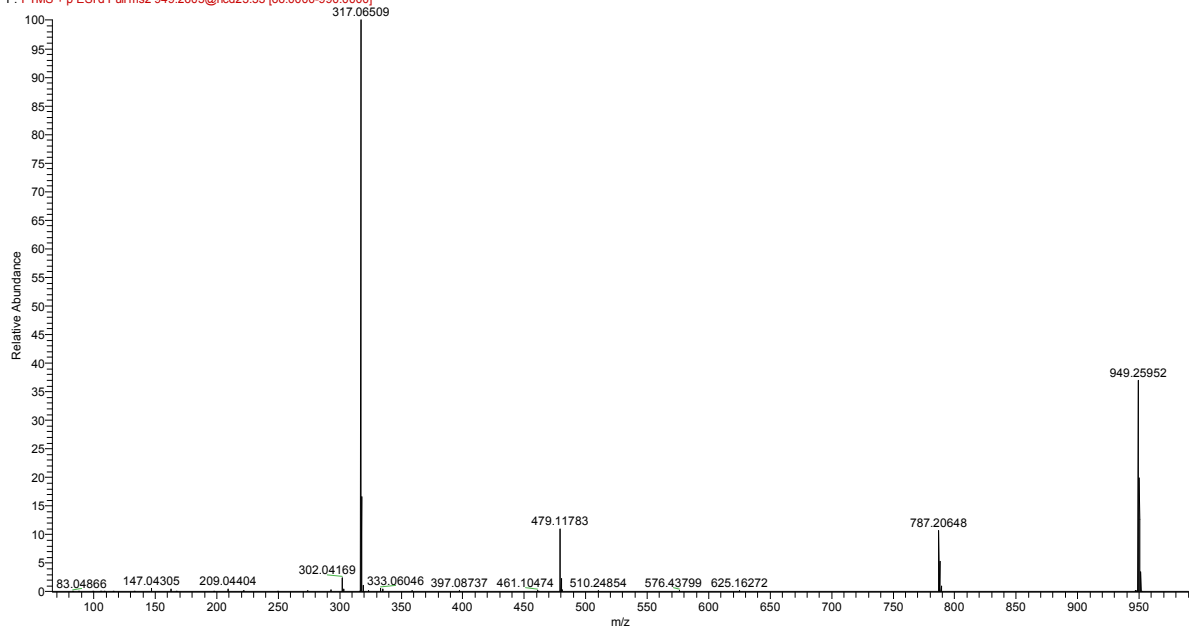

## 6. Delphinidin-3-O-rutinoside (coumaroyl)-5-O-glucoside

RT: 0.00 - 35.00

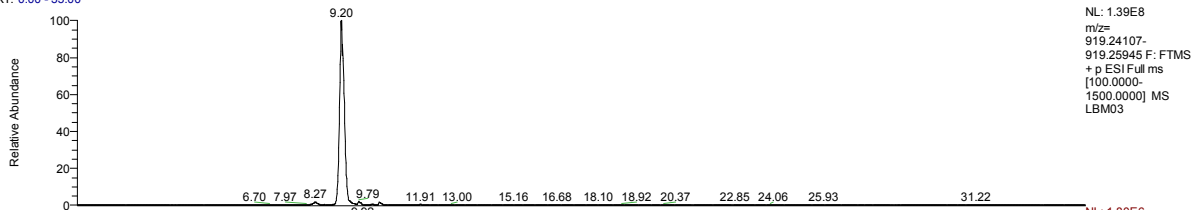

NL: 1.39E8  
m/z=  
919.24107  
919.25945 F: FTMS  
+ p ESI Full ms  
[100.0000-  
1500.0000] MS  
LBM03

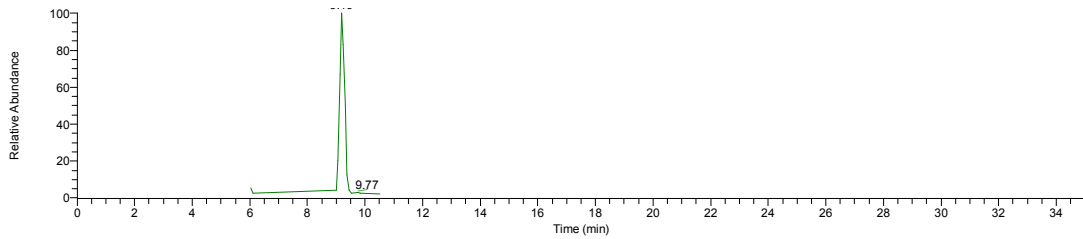

TIC F: FTMS + p  
ESI d Full ms2  
919.2501@hcd23.3  
3  
[63.6667-955.0000]  
MS LBM03

LBM03 #4370 RT: 9.19 AV: 1 NL: 1.38E8

F: FTMS + p ESI d Full ms2 919.2501@hcd23.33 [63.6667-955.0000]

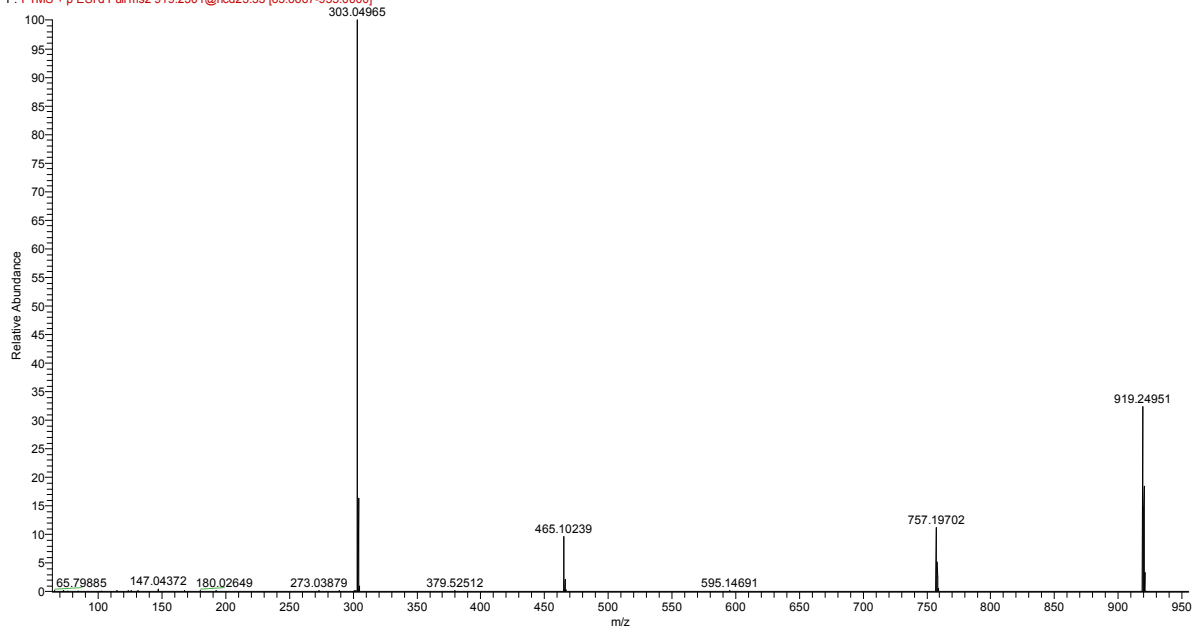

### 7. Petunidin-3-O-[6-O-(4-O-trans-p-coumaroyl- $\alpha$ -L-rhamnopyranosyl)- $\beta$ -D-glucopyranoside]-5-O-[ $\beta$ -D-glucopyranoside]

RT: 0.00 - 35.00

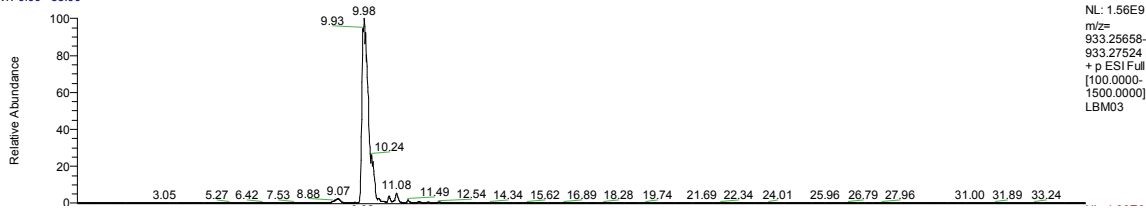

NL: 1.56E9  
m/z:  
933.25658-  
933.27524 F: FTMS  
+ p ESI Full ms  
[100.0000-  
1500.0000] MS  
LBM03

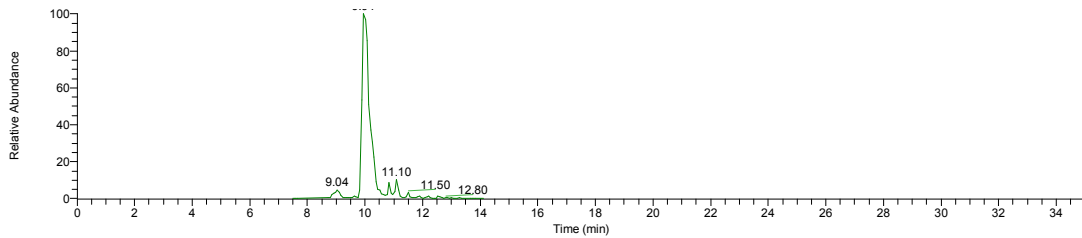

TIC F: FTMS + p  
ESI d Full ms2  
933.2652@hcd23.3  
3  
[64.6667-970.0000]  
MS LBM03



LBM03 #4718 RT: 9.94 AV: 1 NL: 9.58E8

F: FTMS + p ESI d Full ms2 933.2652@hcd23.33 [64.6667-970.0000]

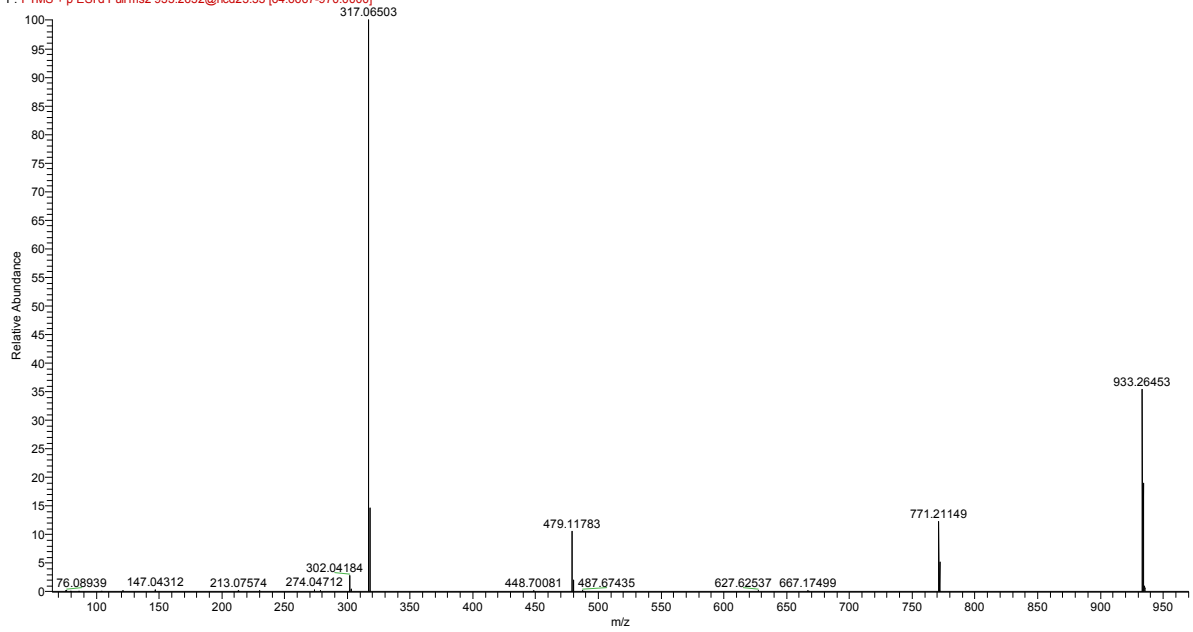

## 8. Delphinidin-3-O-rutinoside

RT: 0.00 - 35.00

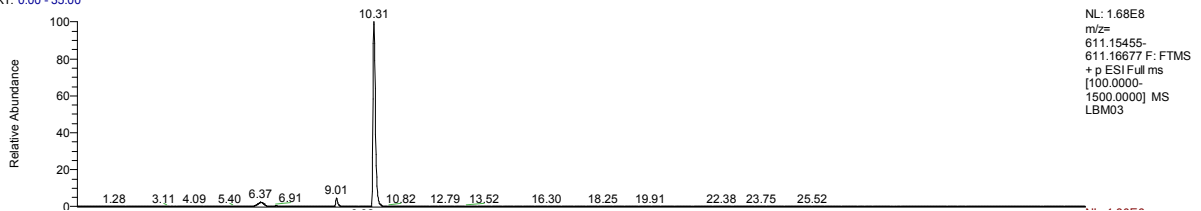

NL: 1.68E8  
m/z=  
611.15455-  
611.16677 F: FTMS  
+ p ESI Full ms  
[100.0000-  
1500.0000] MS  
LBM03

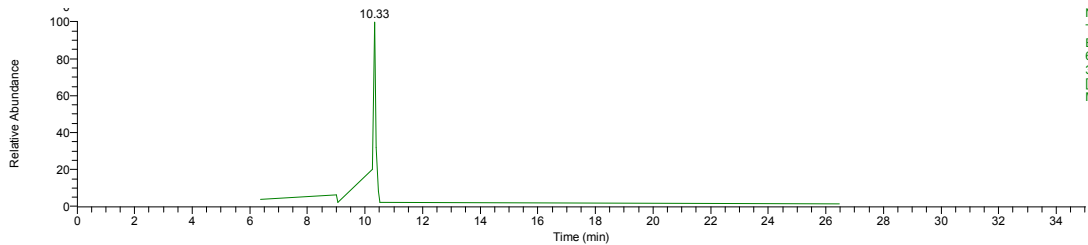

NL: 1.24E8  
TIC F: FTMS + p  
ESI d Full ms2  
611.1603@hcd23.3  
3  
[50.0000-645.0000]  
MS LBM03

LBM03 #4904 RT: 10.33 AV: 1 NL: 7.26E7  
F: FTMS + p ESI d Full ms2 611.1603@hcd23.33 [50.0000-645.0000]

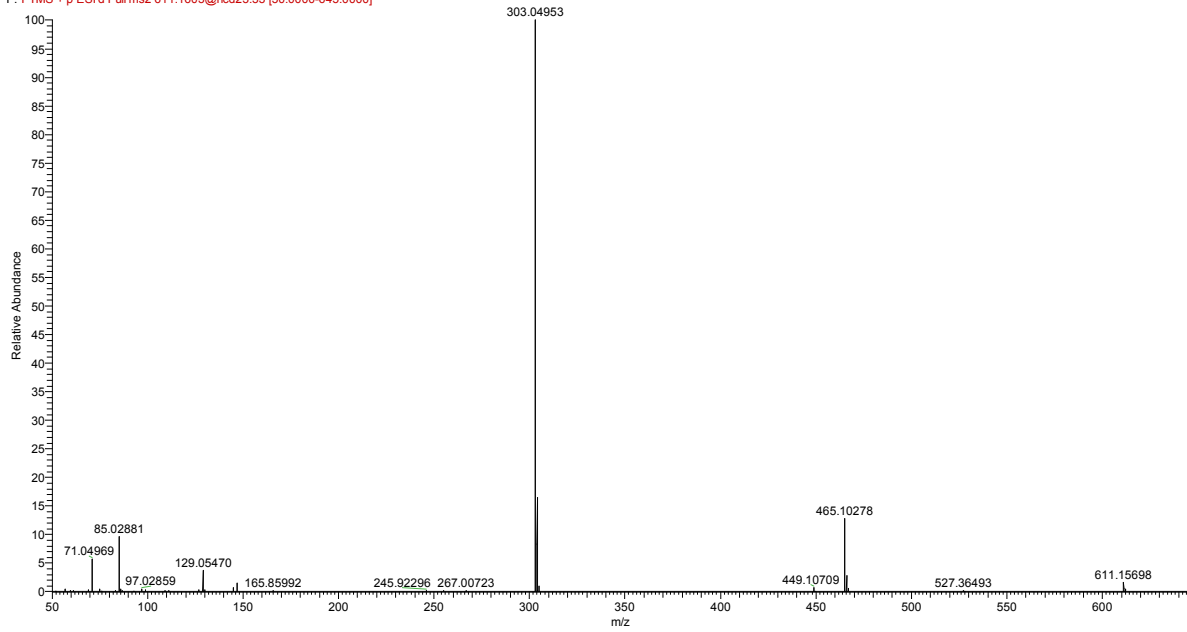

### 9. Malvidin-3-O-rutinoside (*p*-coumaroyl)-5-O-glucoside

RT: 0.00 - 35.00

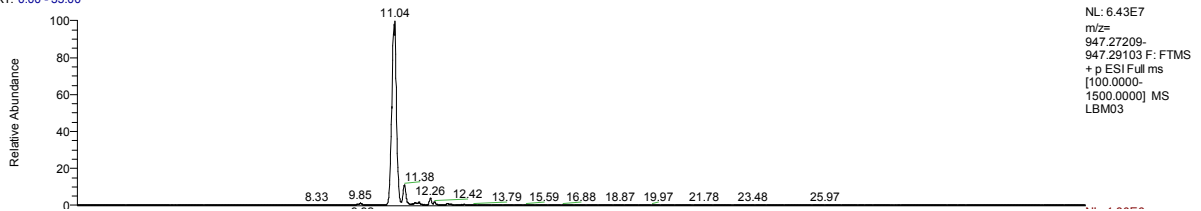

NL: 6.43E7  
m/z=  
947.27209-  
947.29103 F: FTMS  
+ p ESI d Full ms  
[100.0000-  
1500.0000] MS  
LBM03

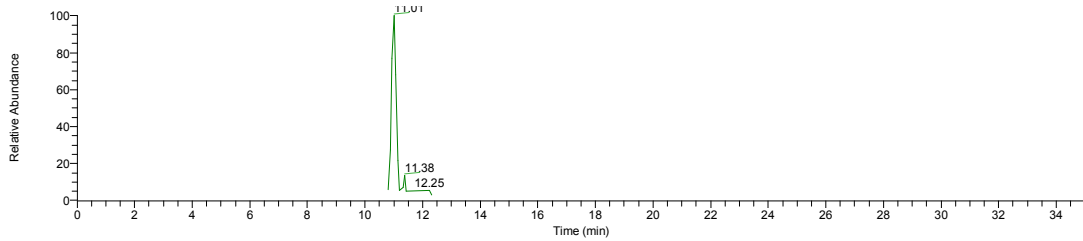

NL: 1.17E9  
TIC F: FTMS + p  
ESI d Full ms2  
947.2808@hcd23.3  
3  
[65.6667-985.0000]  
MS LBM03

LBM03 #5216 RT: 11.01 AV: 1 NL: 7.34E7  
F: FTMS + p ESI d Full ms2 947.2808@hcd23.33 [65.6667-985.0000]

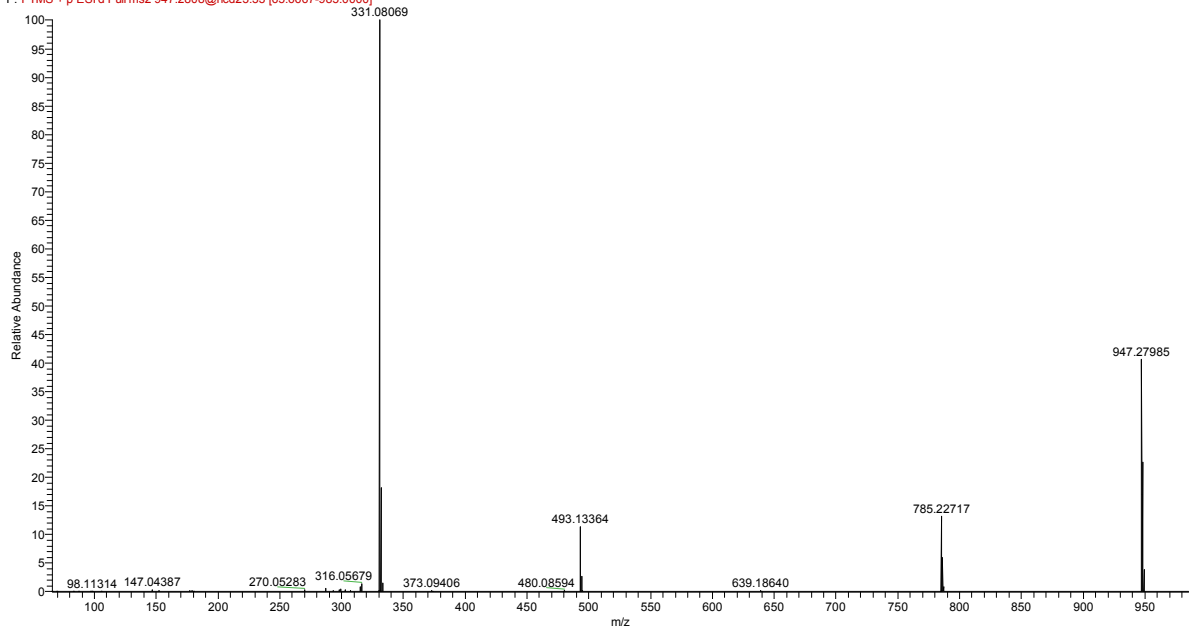

## 10. Cyanidin-3-O-rutinoside

RT: 0.00 - 35.00

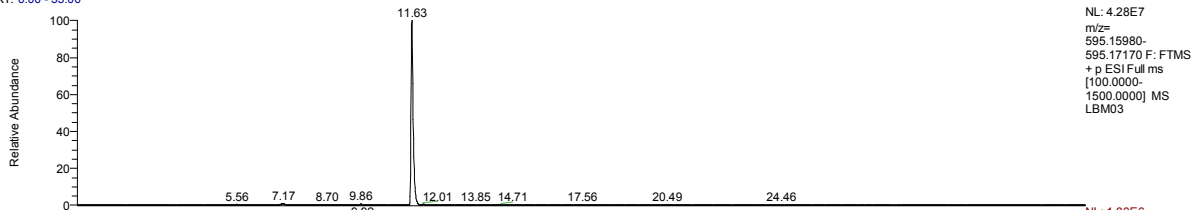

NL: 4.28E7  
m/z=  
595.15980-  
595.17170 F: FTMS  
+ p ESI Full ms  
[100.0000-  
1500.0000] MS  
LBM03

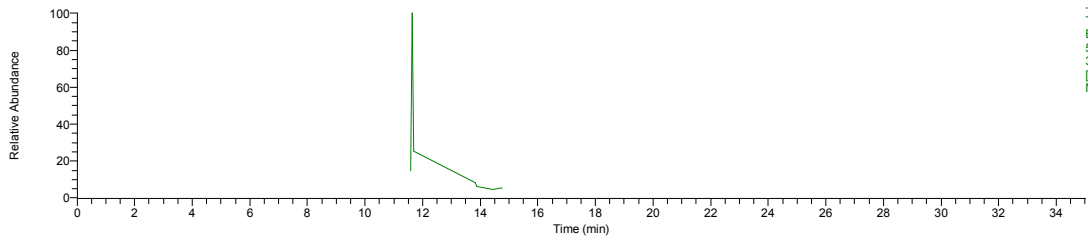

TIC F: FTMS + p  
ESI d Full ms2  
595.1654@hcd23.3  
3  
[50.0000-625.0000]  
MS LBM03

LBM03 #5504 RT: 11.64 AV: 1 NL: 1.99E7  
F: FTMS + p ESI d Full ms2 595.1654@hcd23.33 [50.0000-625.0000]

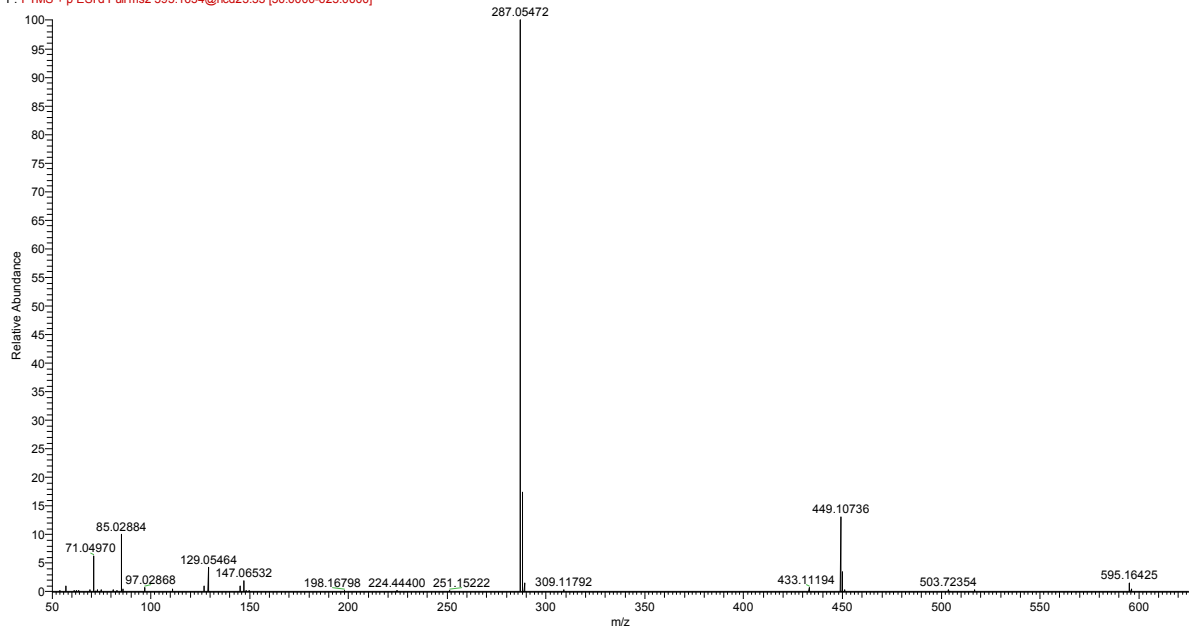

## 12. petunidin-3-O-rutinoside

RT: 0.00 - 35.00

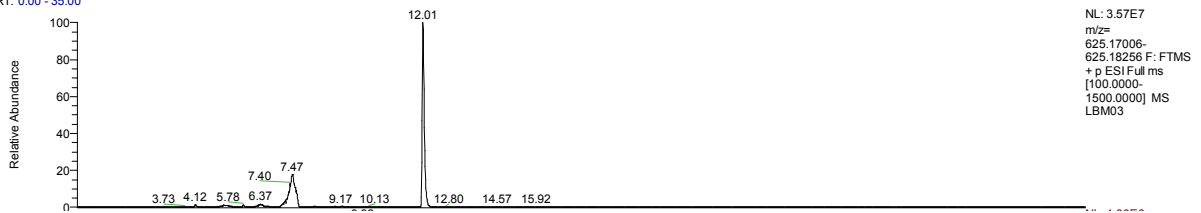

NL: 3.57E7  
m/z=  
625.17006-  
625.19256 F: FTMS  
+ p ESI Full ms  
[100.0000-  
1500.0000] MS  
LBM03

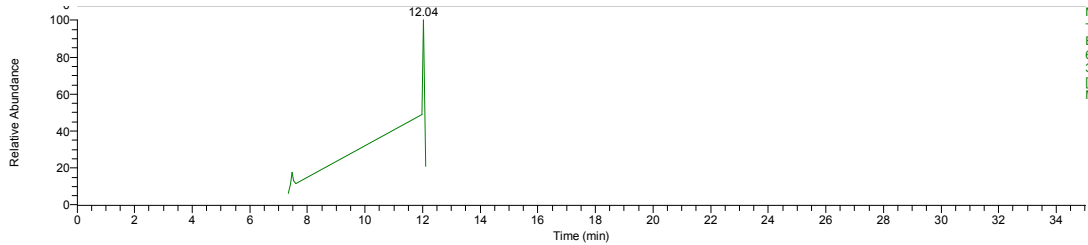

NL: 3.21E7  
TIC F: FTMS + p  
ESI d Full ms2  
625.1760@hcd23.3  
3  
[50.0000-655.0000]  
MS LBM03

LBM03 #5690 RT: 12.04 AV: 1 NL: 1.78E7  
F: FTMS + p ESI d Full ms2 625.1760@hcd23.33 [50.0000-655.0000]

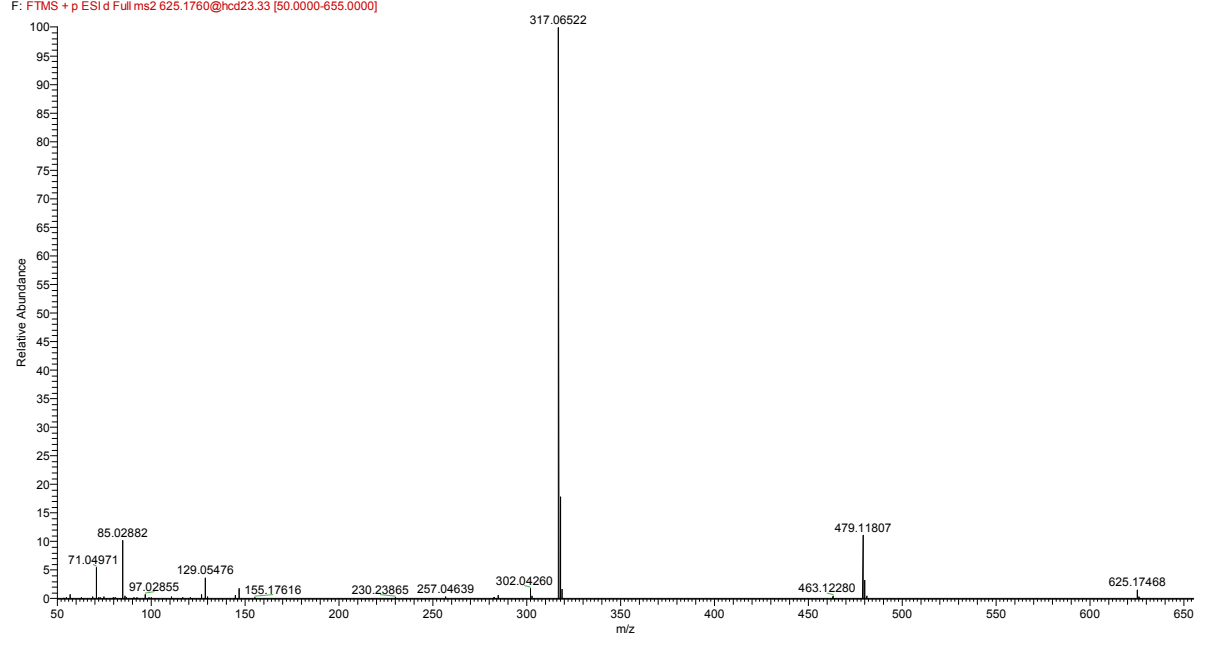

Supplement: d0fo02936j1.pdf [file d0fo02936j1.pdf]
